# Supplementary material
Source: publisher figshare collection journal article supplement (https://sage.figshare.com/ndownloader/files/17647547)
Supplement: Supplementary file 1 [file 17647547]

**Appendix B**

*Demographics of Students Attending Participating Districts Compared to Those That Declined*

| Demographic Characteristics | District Status | M(SD) | *F* | *p* |
| --- | --- | --- | --- | --- |
| % Black or African American Students | Declined | 14.93 (22.02) | .968 | .326 |
| Participated | 18.53 (23.22) |
| % American Indian Students | Declined | 1.08 (2.39) | 4.816* | .029 |
| Participated | .63 (.69) |
| % Asian American Students | Declined | 4.36 (6.39) | 2.677 | .103 |
| Participated | 3.92 (4.02) |
| % Hispanic or Latinx Students | Declined | 24.47 (25.96) | .002 | .963 |
| Participated | 26.30 (26.17) |
| % Hawaiian/Pacific Islander Students | Declined | .35 (.65) | .006 | .937 |
| Participated | .35 (.73) |
| % White Students | Declined | 51.41 (29.74) | .798 | .373 |
| Participated | 46.99 (27.60) |
| % Two or More Race Students | Declined | 3.47 (3.22) | 3.252 | .073 |
| Participated | 3.26 (2.05) |
| % Limited English Proficient Students | Declined | 9.68 (11.44) | 1.567 | .212 |
| Participated | 12.00 (14.13) |
| % Students Receiving Services through IDEA | Declined | 12.74 (5.80) | .695 | .405 |
| Participated | 11.87 (3.46) |
| % Students with 504 Plans | Declined | 2.27 (2.26) | .820 | .366 |
| Participated | 2.38 (2.48) |
| % Students on Free and Reduced Price Lunch | Declined | 54.77 (23.84) | .177 | .674 |
| Participated | 53.58 (22.56) |
| Total Enrollment | Declined | 2647.57 (9650.15) | 1.911 | .173 |
| Participated | 7079.11 (10551.81) |
